# Supplementary material
Source: PubMed Central journal article supplement (PMC5500418)
Supplement: NIHMS857421-supplement-1.pdf [file NIHMS857421-supplement-1.pdf]

# **A STING-Activating Nanovaccine for Cancer Immunotherapy**

Min Luo<sup>1,†</sup>, Hua Wang<sup>2,†</sup>, Zhaohui Wang<sup>1,†</sup>, Haocheng Cai<sup>2</sup>, Zhigang Lu<sup>3</sup>, Yang Li<sup>1</sup>, Mingjian Du<sup>2</sup>, Gang Huang<sup>1</sup>, Chensu Wang<sup>1</sup>, Xiang Chen<sup>2</sup>, Matthew R. Porembka<sup>4</sup>, Jayanthi Lea<sup>5</sup>, Arthur E. Frankel<sup>6</sup>, Yang-Xin Fu<sup>7</sup>, Zhijian J. Chen<sup>2,8,\*</sup> and Jinming Gao<sup>1,\*</sup>

*<sup>1</sup>Department of Pharmacology, Simmons Comprehensive Cancer Center; <sup>2</sup>Department of Molecular Biology; <sup>3</sup>Department of Developmental Biology; <sup>4</sup>Department of Surgery; <sup>5</sup>Department of Obstetrics and Gynecology; <sup>6</sup>Department of Internal Medicine; <sup>7</sup>Department of Pathology; <sup>8</sup>Howard Hughes Medical Institute, University of Texas Southwestern Medical Center, 5323 Harry Hines Blvd., Dallas, Texas 75390, USA*

<sup>†</sup>These authors contributed equally to this work.

\*Co-corresponding authors.

Correspondence and requests for materials should be addressed to J.G. (jinming.gao@utsouthwestern.edu) or Z.J.C (zhijian.chen@utsouthwestern.edu).

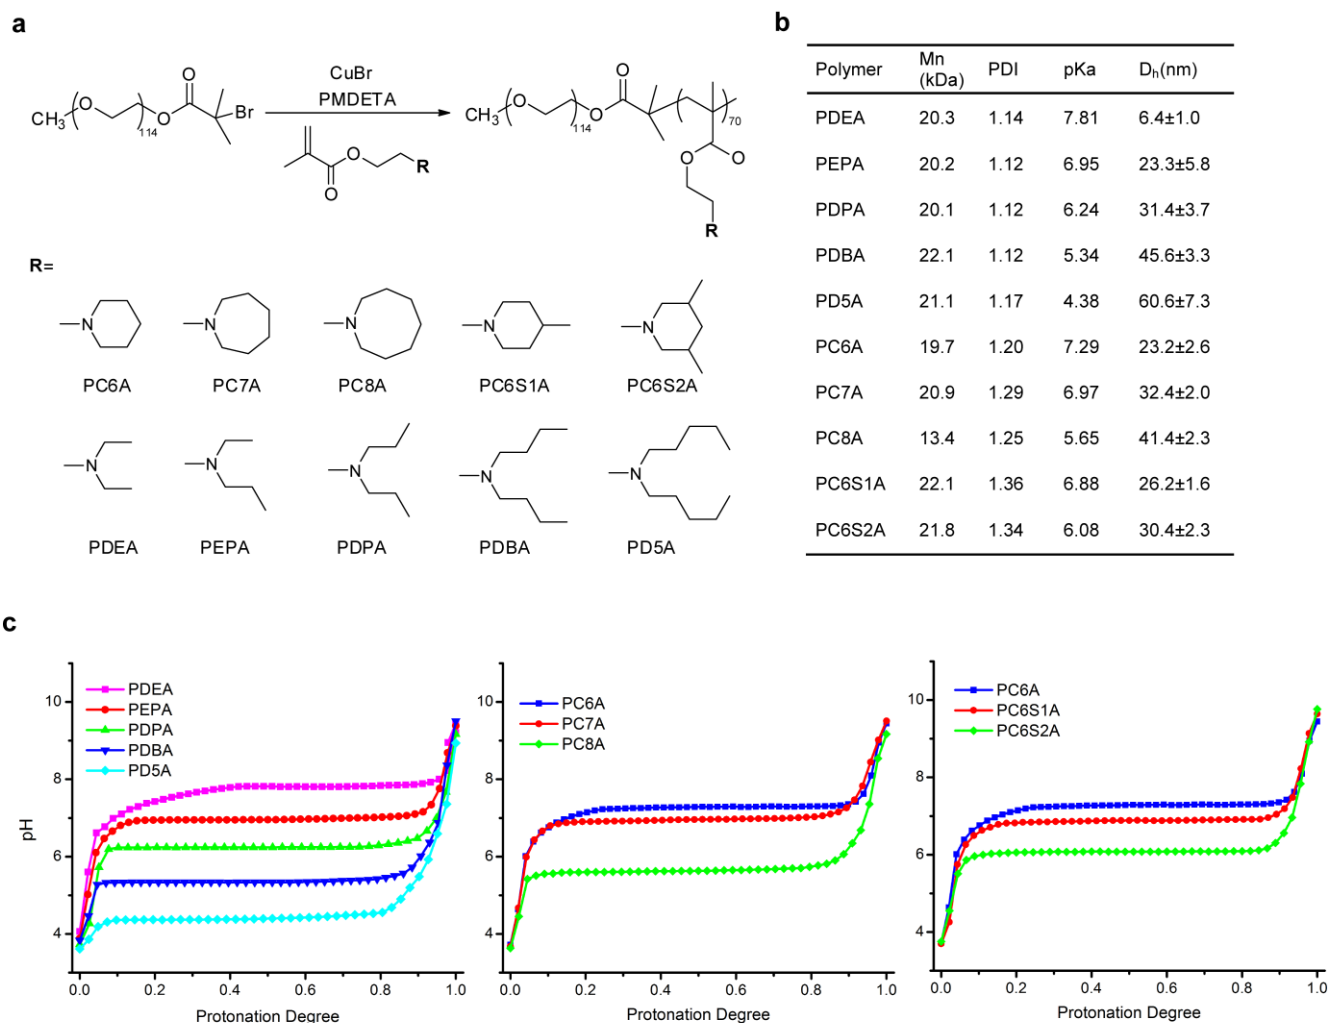

## Supplementary Figure 1

### Syntheses and pH titration of ultra-pH sensitive (UPS) PEG-*b*-PR block copolymers.

(a) Schematic syntheses of block copolymers using an atom-transfer radical polymerization (ATRP) method. PEG-Br (MW = 5 kD) was used as an initiator and methacrylates with different tertiary amine side chains were used as monomers. (b) Characterization of the copolymers from the library. Number-averaged molecular weight (Mn) was determined by GPC using THF as the eluent; pKa was determined by pH titration of polymer solutions using 4 M NaOH. Size was measured using dynamic light scattering, mean ± s.d. (c) pH titration of UPS copolymers displayed pH-specific buffer effect from pH 4 to 8. For the cyclic series, both the size of cyclic rings (i.e., 6, 7 and 8) and number of methyl substitutions (e.g., 0, 1 and 2) on the 6-membered ring were investigated. Copolymers with similar hydrophobic strengths (e.g., PC7A vs. PC6S1A; PC8A vs. PC6S2A) share similar pKa values despite different polymer architectures and CTL response (see Fig. 1b).

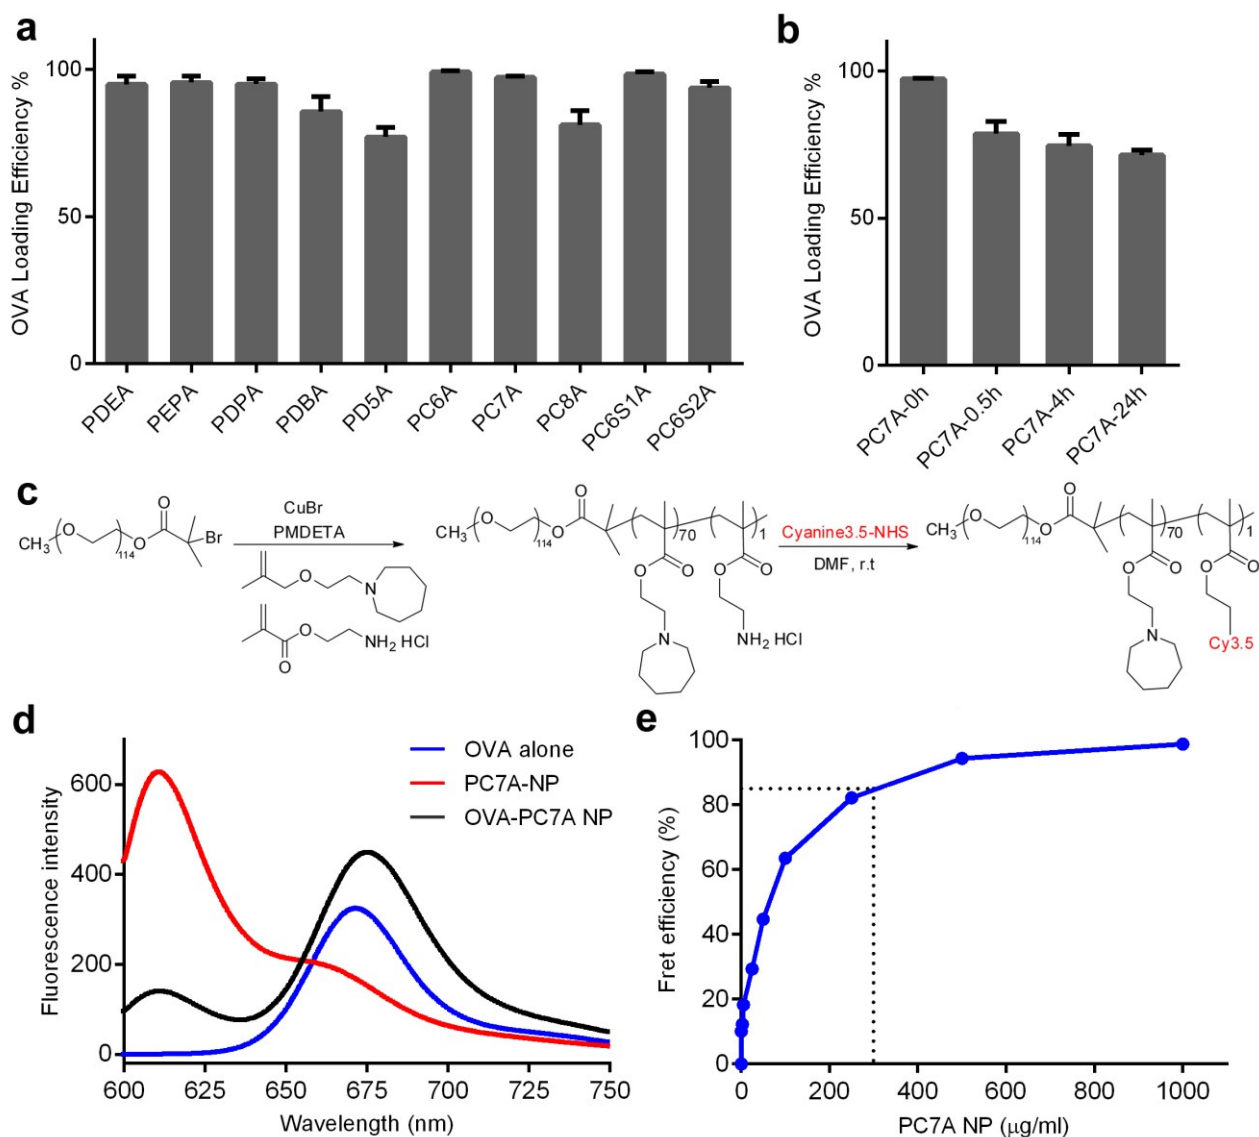

**Supplementary Figure 2**

### Efficient loading of OVA in PC7A NP through a physical mixing procedure.

(a) The OVA loading efficiency in the micelle nanoparticles was measured by an ultrafiltration method. (b) Loading stability of OVA in PC7A micelles was examined in PBS buffer (pH 7.4) containing 5% fetal bovine serum at different time points. (c) Schematic synthesis of dye-conjugated PEG-*b*-PC7A copolymer. Cy3.5 was used as a dye example. (d) Fluorescence spectra of Cy3.5 labelled PC7A, AF647-OVA and PC7A+OVA mixture, which showed strong fluorescence resonance electron transfer (FRET) effect in the mixture group indicating OVA loading inside PC7A NP. (e) AF647-OVA (100μg/mL) was incubated with serially diluted Cy3.5-conjugated PC7A in PBS buffer (pH = 7.4), dotted line showed the working concentration of nanovaccine and its FRET efficiency. In **a** and **b**, representative data from three independent experiments are presented as means  $\pm$  s.e.m..

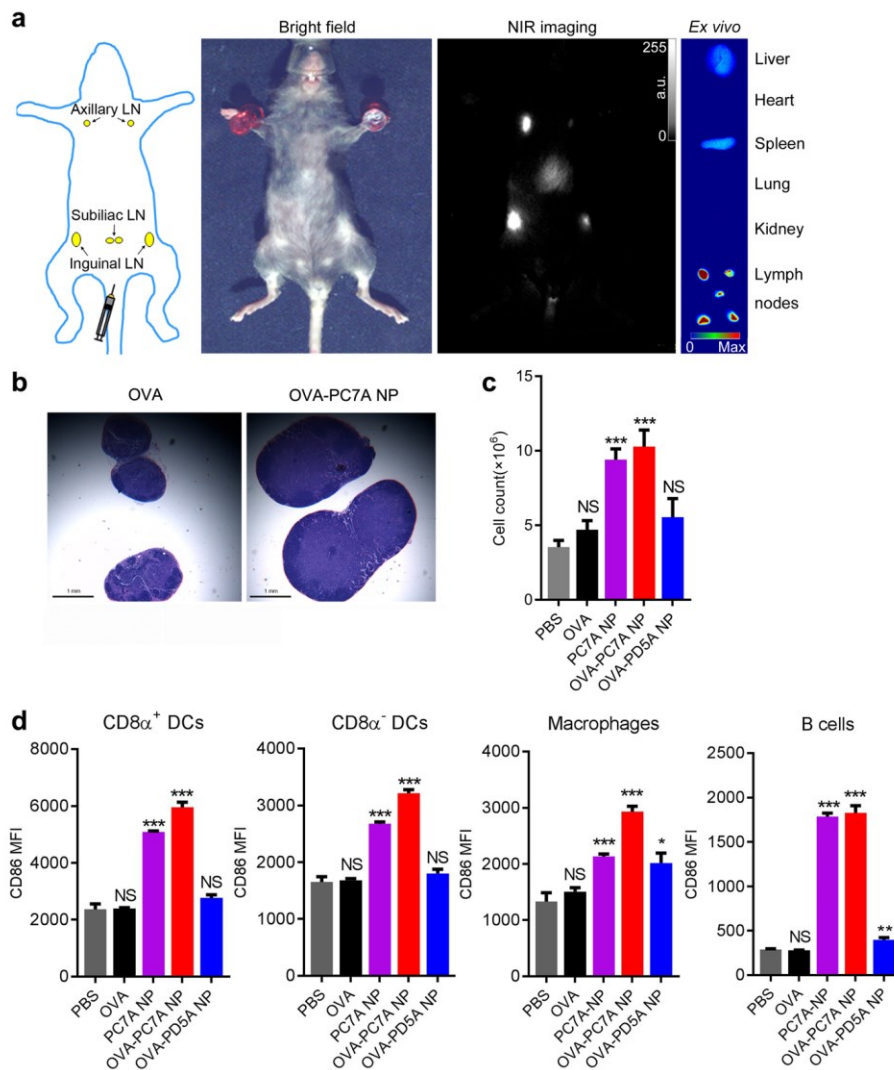

**Supplementary Figure 3**

**PC7A NP improves antigen delivery in draining lymph nodes, induces LN inflammation and APC maturation.**

(a) Near infrared imaging of ICG-labelled PC7A NP accumulation in lymphoid organs after subcutaneous injection at the tail base of C57BL/6 mice (n=3). After 24 h, lymph nodes and major organs were collected, and *ex vivo* imaging showed high PC7A NP accumulation in the lymph nodes over other organs. (b) Midline cross-section (maximal surface) of resected draining lymph nodes from C57BL/6 mice showed enlarged nodes by PC7A NP over OVA alone. (c) Quantification of total cell numbers in the draining lymph nodes at 24 h. Enlarged lymph nodes and increased cell number in the PC7A NP group indicate innate stimulation (n=5). (d) Quantitative comparison of CD86 expressions in CD8 $\alpha^+$ , CD8 $\alpha^-$  DCs, macrophages and B cells in inguinal lymph nodes 24 h after injection of nanovaccine (n=5 for each group). In c and d, representative data from three independent experiments are presented as means  $\pm$  s.e.m.. Statistical significance was calculated by Student's *t*-test, \*\*\*P<0.001, \*\*P<0.01, \*P<0.05. NS, not significant.

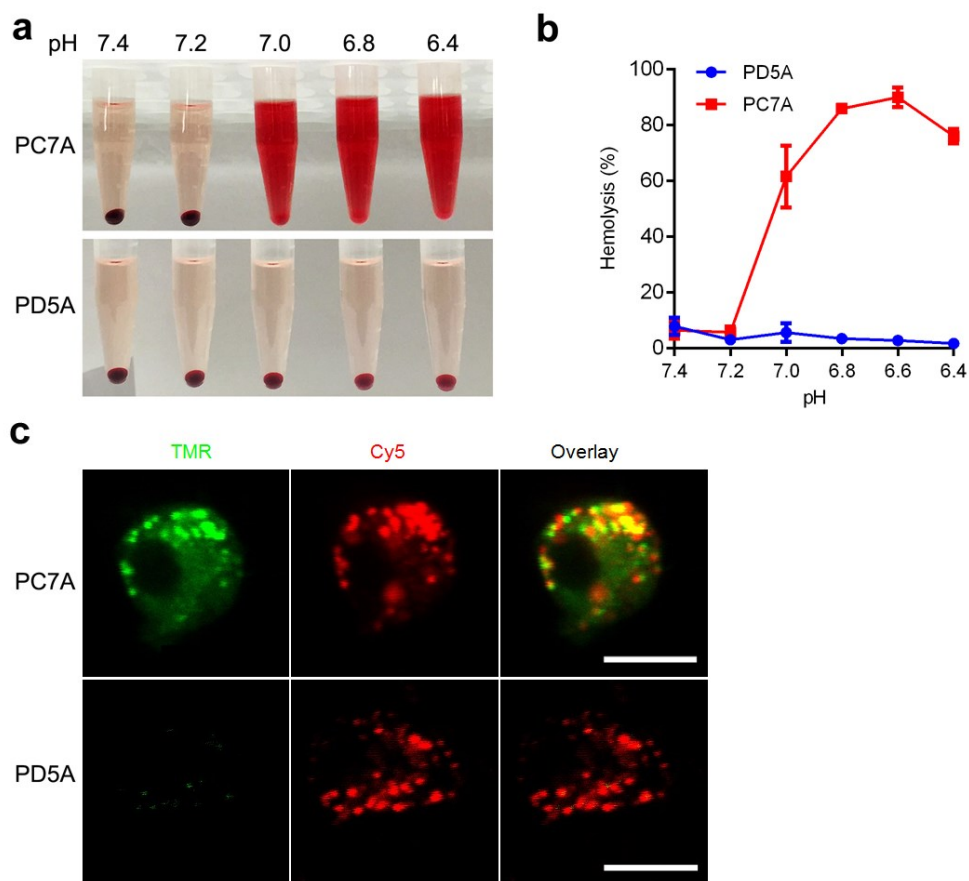

## Supplementary Figure 4

### PC7A NP disrupts membranes at acidic pH.

(a) Hemolytic analysis of the red blood cells after treatment with PC7A or PD5A copolymers in different pH medium. (b) Percentage of hemolysis was quantified by the release of hemoglobin into the medium as a function of pH for PC7A or PD5A NP ( $n=3$ ). Both polymer concentrations were controlled at 20  $\mu\text{g/mL}$ . (c) Confocal microscopy analysis of endo-lysosomal escape and cytosolic delivery of redox-activatable sensor-labeled OVA in live cells. DC2.4 cells were co-incubated with OVA (15  $\mu\text{g/mL}$ ) and PC7A or PD5A NP (50  $\mu\text{g/mL}$  for copolymer concentration) for 30 min. Both the donor TMR (green) and acceptor Cy5 (red) signals from the redox-activatable sensor were imaged at 12 h after incubation. PC7A NP allowed higher amount of cytosolic delivery of OVA as indicated by the TMR donor signal. Scale bars = 10  $\mu\text{m}$ . In **b**, representative data from three independent experiments are presented as means  $\pm$  s.e.m..

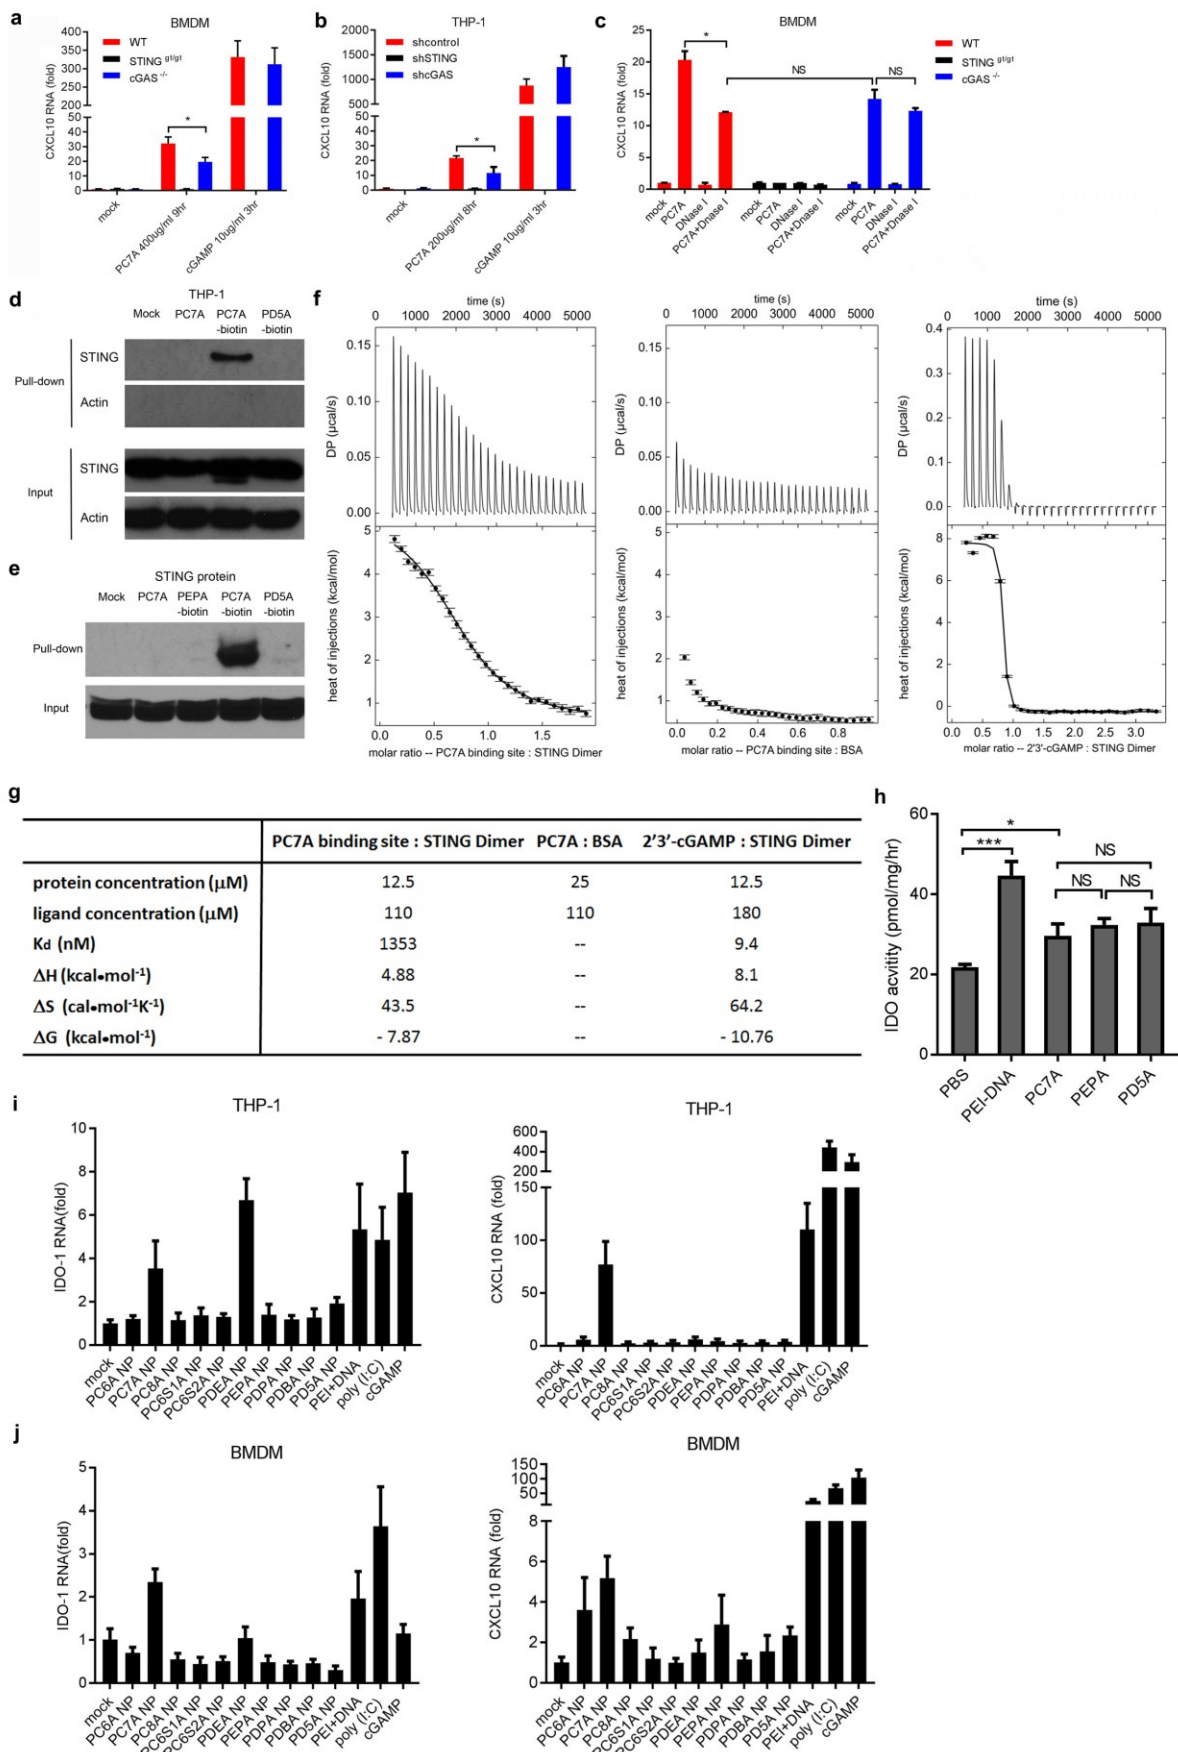

## Supplementary Figure 5

### PC7A NP activates type I IFN-induced genes through STING pathway.

Mouse bone marrow derived macrophages (BMDMs, **a**), human THP-1 monocytic cells (**b**) were incubated with PC7A NP at indicated concentration and time, followed by measurement of CXCL10 mRNA by qPCR (n=3). cGAMP, a STING activator transfected by lipofectamine was used as a positive control. Results show STING-dependent expression of CXCL10 in both cell lines. (**c**) BMDMs were transfected with DNase I for 1 hr, and followed by treatment with PC7A NP. CXCL10 mRNA was measured by qPCR (n=3). (**d**) PC7A NP treated THP-1 cells resulted in pulldown of STING proteins by streptavidin modified dynabeads. PD5A-biotin and PC7A only (biotin free) controls did not show any STING pulldown. (**e**) Direct pulldown assay of purified human STING C-terminal domain (CTD, 139-379AAs). PC7A-biotin copolymer pulled down STING CTD, but not other copolymers or PC7A only control. (**f**) Titration of PC7A binding to STING CTD by isothermal calorimetry (ITC) experiments. The original titration traces (top) and integrated data (bottom) were shown. ITC of PC7A-bovine serum albumin (BSA) was used as a negative control and cGAMP-STING CTD as a positive control. (**g**) Summary of binding affinity in ITC experiment. Negligible binding was found between PC7A and BSA. (**h**) Measurement of IDO enzyme activity in spleen cells after subcutaneous injection of different copolymers (150  $\mu$ g, n=5). PEI-DNA (30  $\mu$ g) was used as a positive control. (**i**) Human THP-1 and (**j**) mouse BMDM cells were treated with different NPs, followed by measurement of IDO-1 and CXCL10 mRNAs by qPCR (n=3). PEI-DNA, Poly(I:C) and cGAMP were used as positive controls. In **a-c**, and **i-j**, representative data from three independent experiments are presented as means  $\pm$  s.e.m.. In **h**, representative data from two independent experiments are presented as means  $\pm$  s.e.m.. Statistical significance was calculated by Student's *t*-test, \*\*\*P<0.001, \*\*P<0.01, \*P<0.05. NS, not significant.

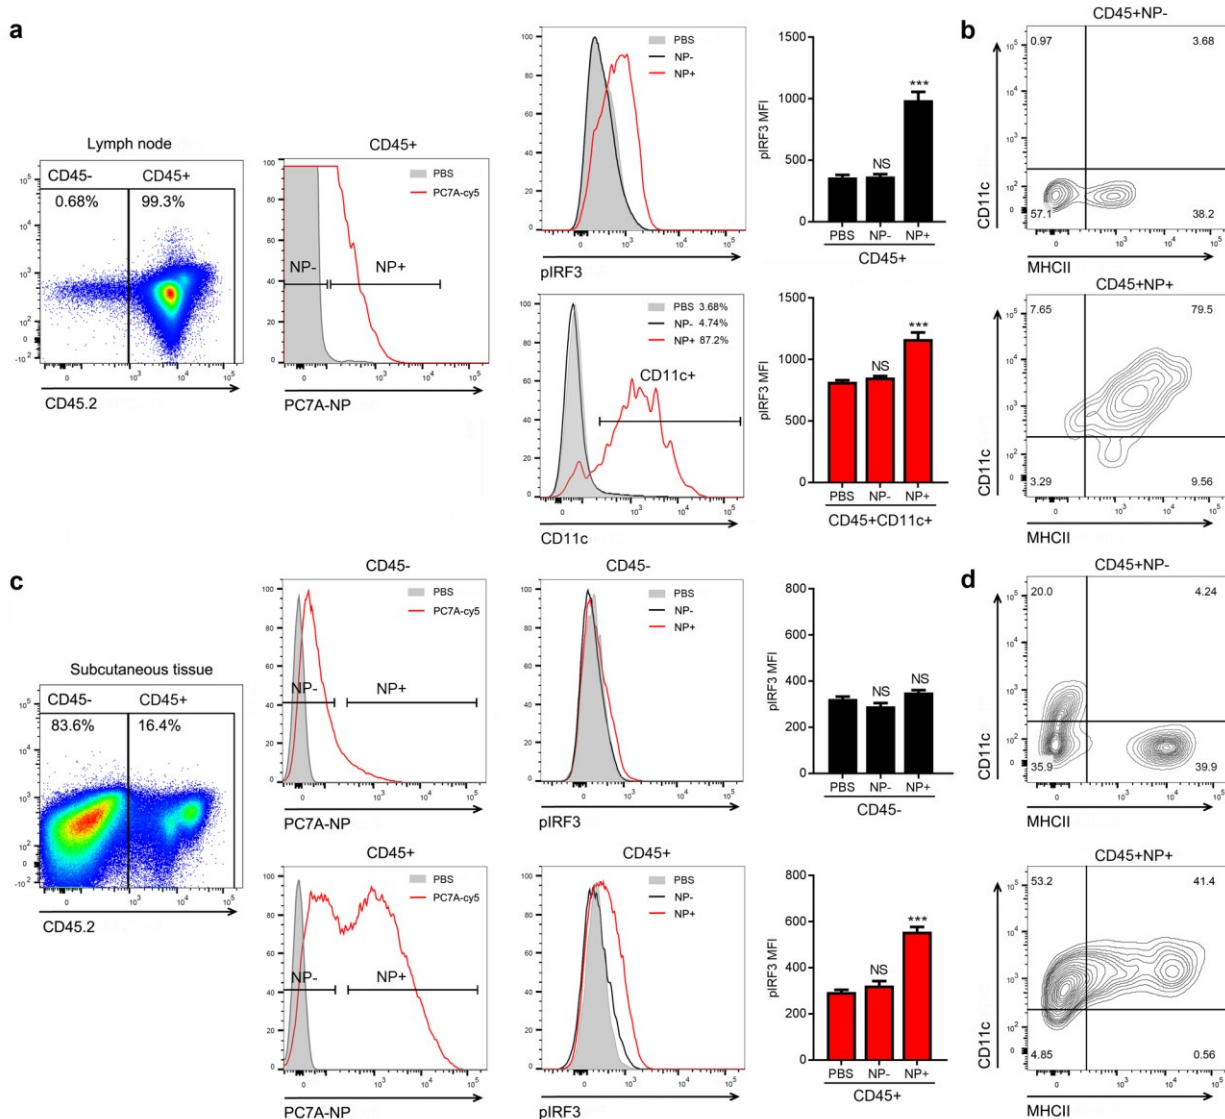

**Supplementary Figure 6**

**APCs are the major cell population that take up PC7A NP and activate STING pathway *in vivo*.**

PC7A NP-Cy5 was injected subcutaneously at the tail base of C57BL/6 mice, and PBS injected mice were included as control (n=5). After 24 hrs, inguinal LNs and subcutaneous tissue were isolated, and made into single cell suspension. Cells were first gated on live cells and then divided as leukocytes (CD45+) and non-leukocytes (CD45-). By the fluorescence of PC7A NP, cells from NP treated mice were divided into NP+ and NP- populations. The pIRF3 expression and DC marker CD11c were assessed in these subsets. **(a)** Comparative assessment of CD45+NP+ and CD45+NP- cells in LNs. **(b)** Phenotypic analysis of NP+ and NP- cells in LNs by flow cytometry. **(c)** Assessment of NP accumulated cells (NP+) in both CD45+ and CD45- cells from subcutaneous tissue. **(d)** Phenotypic analysis of CD45+NP- and CD45+ NP+ cells in subcutaneous tissue by flow cytometry. In **a** and **c**, representative data from two independent experiments are presented as means  $\pm$  s.e.m.. Statistical significance was calculated by Student's *t*-test, \*\*\*P<0.001. NS, not significant.

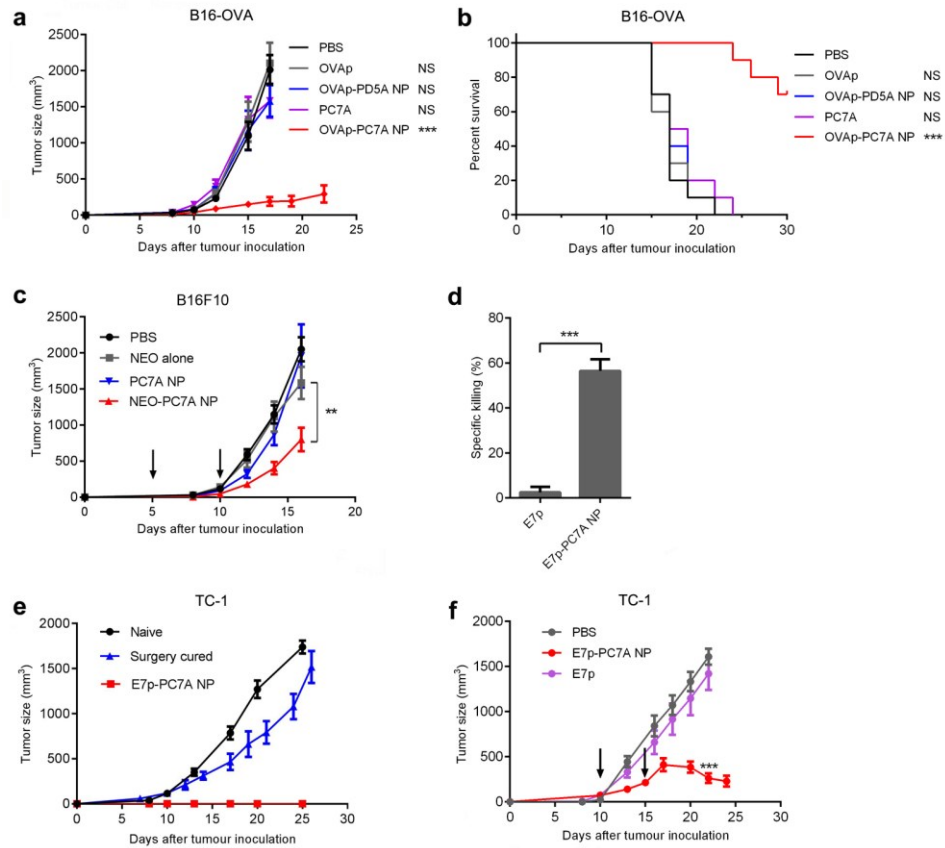

### Supplementary Figure 7

**PC7A nanovaccine inhibits tumor growth and prolongs survival.** C57BL/6 mice (n=10 per group) were first inoculated with  $1.5 \times 10^5$  B16-OVA tumor cells and followed by treatment with OVA peptide (0.5  $\mu$ g), OVAp-PD5A NP, PC7A alone or OVAp-PC7A NP. PC7A NP alone without OVAp had no observable effect in tumor growth inhibition(**a**) or animal survival curves(**b**). (**c**) Tumor growth inhibition of B16F10 treated by neoantigen-PC7A NP. C57BL/6 mice (n=10 per group) inoculated with  $1.5 \times 10^5$  B16F10 tumor cells were treated with a cocktail of neoantigens (Obsl1<sub>T1764M</sub>, Kif18b<sub>K739N</sub>, Def8<sub>R255G</sub>) in PC7A NP (0.5  $\mu$ g for each peptide, 30  $\mu$ g polymer) per time points indicated by the arrows. (**d**) C57BL/6 mice (n=3 per group) were immunized with E7 peptide (E7p, 0.5  $\mu$ g) and E7p-PC7A NP. E7-specific cytotoxicity was measured using an *in vivo* cytotoxicity killing assay. (**e**) Naïve mice or tumor-free mice 82 days after tumor inoculation in TC-1 model (n=10 per group) were challenged with  $1 \times 10^6$  TC-1 tumor cells. On day 30 after surgery, mice were rechallenged with  $1 \times 10^6$  TC-1 tumor cell. Memory T cells in the nanovaccine cured group completely inhibited tumor growth over 60 days. (**f**) Tumor growth inhibition curves in C57BL/6 mice (n=10 per group) inoculated with  $1.5 \times 10^5$  TC-1 tumor cells and treated with nanovaccine at day 10 and 15 when tumors were established at  $\sim 100$  mm<sup>3</sup>. In **a** and **c-f**, data are presented as means  $\pm$  s.e.m.. Statistical significance was calculated by Student's *t*-test, \*\*\*P<0.001, \*\*P<0.01, \*P<0.05. NS, not significant. Statistical significance for survival analysis in **b** was calculated by the log-rank test, \*\*\*P<0.001. NS, not significant.

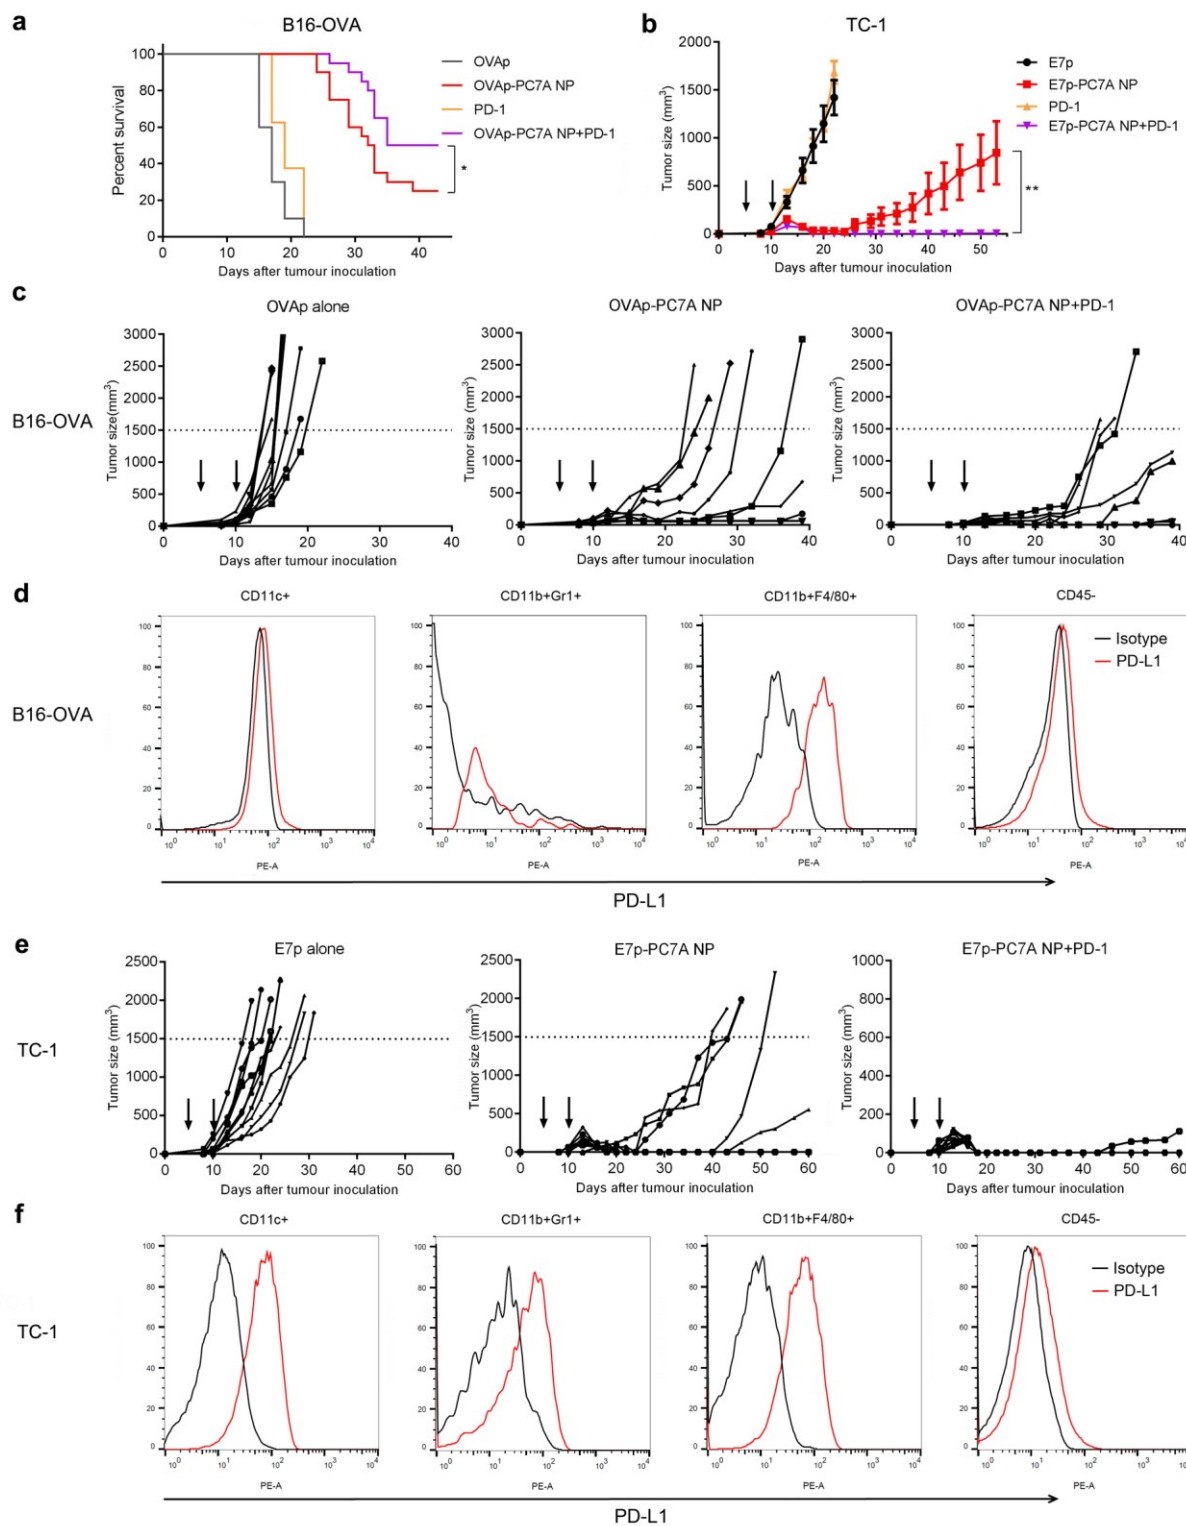

**Supplementary Figure 8**

### Synergy effect of nanovaccine and anti-PD-1 antibody in two tumor models.

(a) C57BL/6 mice inoculated with  $1.5 \times 10^5$  B16-OVA tumor cells were treated with OVA peptide, PC7A nanovaccine, anti-PD-1 alone and anti-PD-1 in combination with PC7A nanovaccine. Kaplan–

Meier survival curves of tumor-bearing mice were shown. **(b)** Long-term tumor growth inhibition curves in C57BL/6 mice (n=10 per group) inoculated with  $1.5 \times 10^5$  TC-1 tumor cells followed by treatment with E7p (0.5  $\mu$ g), PC7A nanovaccine, and a combination of anti-PD-1 and nanovaccine. **(c)** Individual tumor growth curves for OVAp alone, OVAp-PC7A NP, and OVAp-PC7A NP combined with anti-PD-1. **(d)** The PD-L1 expression profile in B16-OVA tumors. The PD-L1 were highly expressed in MDSCs (CD11b+Gr1+) and macrophages (CD11b+F4/80+) over the isotype control whereas the expression in DCs (CD11c+) and B16-OVA melanoma cells (CD45-) are modest. **(e)** Individual tumor growth curves for E7p alone, E7p-PC7A NP, and E7p-PC7A NP combined with anti-PD-1. Data show 50% and 90% of mice had tumor-free survival in the E7p-PC7A NP and E7p-PC7A NP/anti-PD-1 groups, respectively. **(f)** The PD-L1 expression profile in TC-1 tumors. The PD-L1 expressions were highly expressed in DCs, MDSCs, and macrophages over the isotype control whereas the expression in TC-1 tumor cells is modest. In **b**, data are presented as means  $\pm$  s.e.m.. Statistical significance was calculated by Student's *t*-test, \*\*P<0.01. Statistical significance for survival analysis in **a** was calculated by the log-rank test, \*P<0.05.

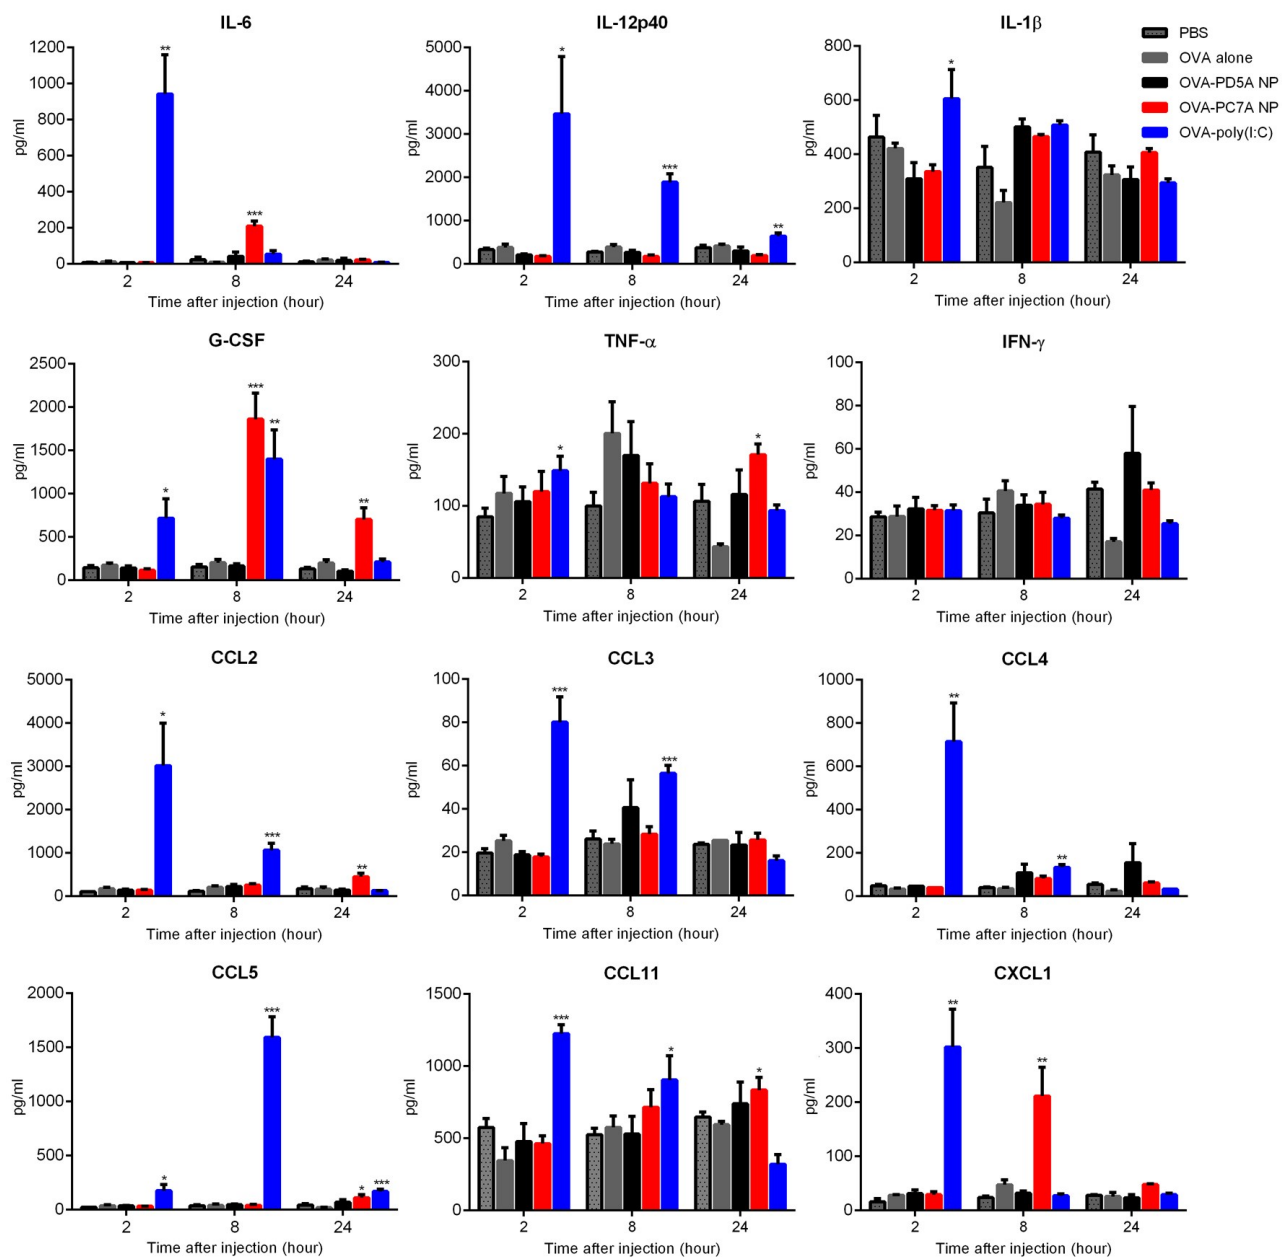

**Supplementary Figure 9**

**PC7A nanovaccine showed less systemic cytokine levels compared to Poly(I:C).**

C57BL/6 mice (n=5 per group) were subcutaneously injected with 10  $\mu$ g OVA plus 150  $\mu$ g PC7A NP or the same dose of Poly(I:C). Systemic cytokines and chemokines in the serum were measured over time by bead-based Bio-Plex Pro Mouse Cytokine 23-plex Assay. IL-1 $\alpha$ , IL-2, IL-3, IL-4, IL-5, IL-9, IL-10, IL-12 (p70), IL-13, IL-17, GM-CSF did not show any significant difference in all groups and were not included in this figure. Data are presented as means  $\pm$  s.e.m.. Statistical significance was calculated by Student's *t*-test, \*\*\**P*<0.001, \*\**P*<0.01, \**P*<0.05.

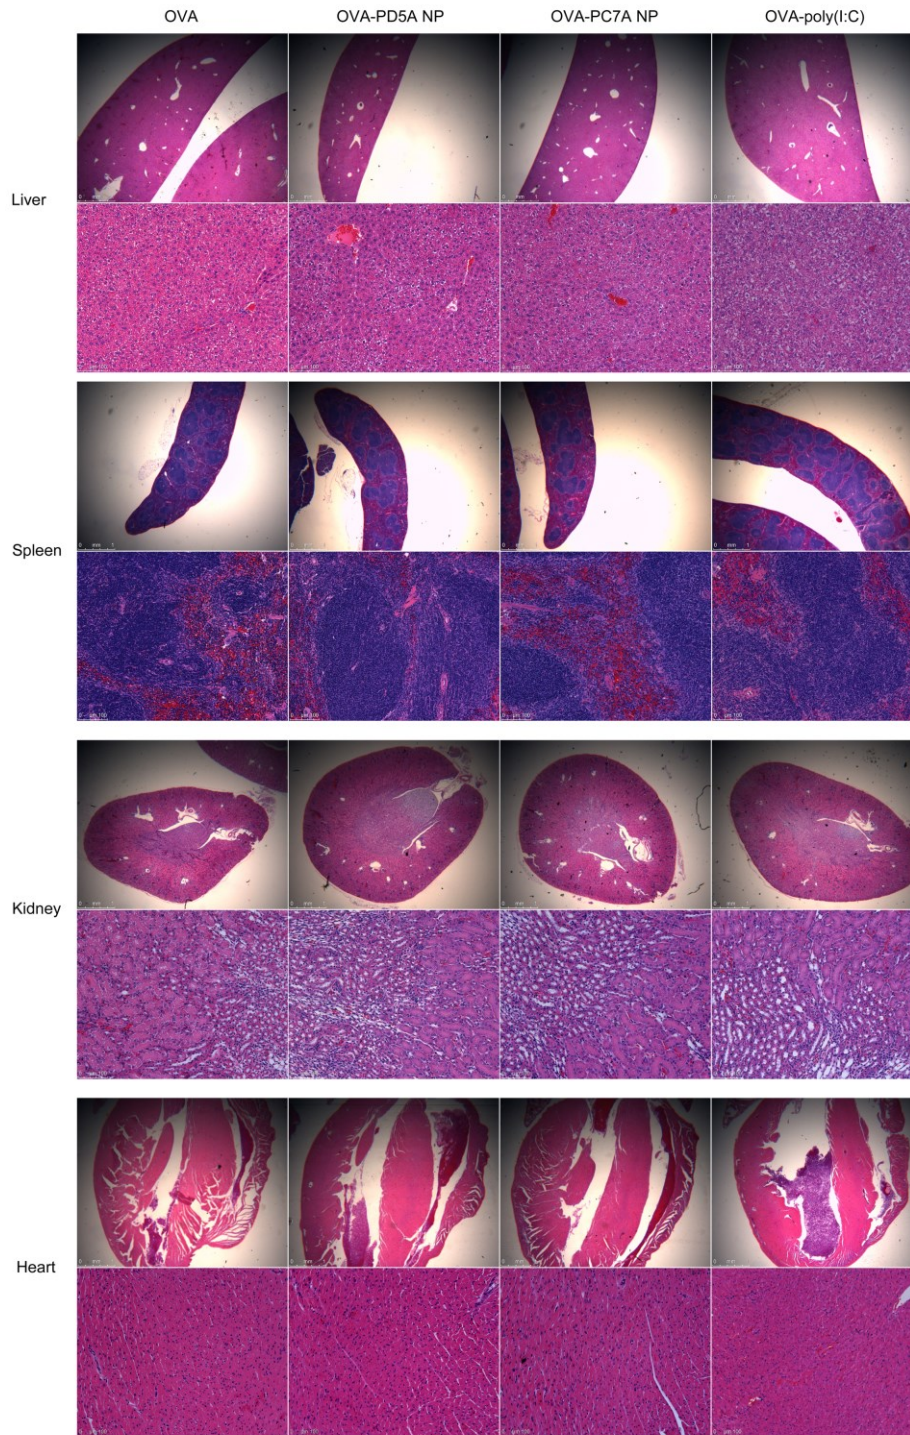

### Supplementary Figure 10

#### Histology analyses of major organs for safety assessment of PC7A nanovaccine.

Representative H&E sections of the main organs from C57BL/6 mice after repeated injections of 10  $\mu$ g OVA plus 150  $\mu$ g PC7A NP or the same dose of Poly(I:C). Mice were sacrificed 24h after the second injection (n=5 for each group). Liver in Poly(I:C) group showed ballooned hepatocytes indicative of steatohepatitis. Spleen, kidney and heart showed no abnormalities for all the groups.
